# Supplementary material
Source: MDPI journal article supplement (https://www.mdpi.com/1996-1073/8/8/8286)
Supplement: s3 [file s3]

data_NH4Ca(BH4)3
_chemical_name_mineral ?NH4Ca(BH4)3?
_cell_length_a 5.623268(68)
_cell_length_b 5.623268(68)
_cell_length_c 5.623268(68)
_cell_angle_alpha 90
_cell_angle_beta 90
_cell_angle_gamma 90
_cell_volume 177.8142(64)
_cell_measurement_temperature     293
_symmetry_space_group_name_H-M P-43m
loop_
	_symmetry_equiv_pos_as_xyz
	 'x, y, z '
	 '-x, -z, y '
	 '-x, z, -y '
	 '-x, y, -z '
	 '-y, -x, z '
	 '-y, -z, x '
	 '-y, z, -x '
	 '-y, x, -z '
	 '-z, -x, y '
	 '-z, -y, x '
	 '-z, y, -x '
	 '-z, x, -y '
	 'z, -x, -y '
	 'z, -y, -x '
	 'z, y, x '
	 'z, x, y '
	 'y, -x, -z '
	 'y, -z, -x '
	 'y, z, x '
	 'y, x, z '
	 'x, -y, -z '
	 'x, -z, -y '
	 'x, z, y '
	 '-x, -y, z '
loop_
_atom_site_label
_atom_site_type_symbol
_atom_site_symmetry_multiplicity
_atom_site_fract_x
_atom_site_fract_y
_atom_site_fract_z
_atom_site_occupancy
_atom_site_B_iso_or_equiv
Ca Ca   0 0.5 0.5 0.5 1 2.820(32)
B B   0 0 0.5 0.5 1 5.000(85)
H1 H   0 -0.11599(76) 0.61777(77) 0.38223(75) 1 5.000(85)
N N   0 0 0 0 1 5.000(67)
H2 H   0 0.11291(80) 0.11291(79) -0.11291(78) 1 5.000(67)
